# Supplementary material for: Fast pain relief in exercise-induced acute musculoskeletal pain by turmeric-boswellia formulation: A randomized placebo-controlled double-blinded multicentre study
Source: PubMed Central journal article supplement (PMC9439841; doi:10.1097/md.0000000000030144), 2022-09-02

Supplementary figure S1. Cumulative proportion of responder analysis - NRS at Rest

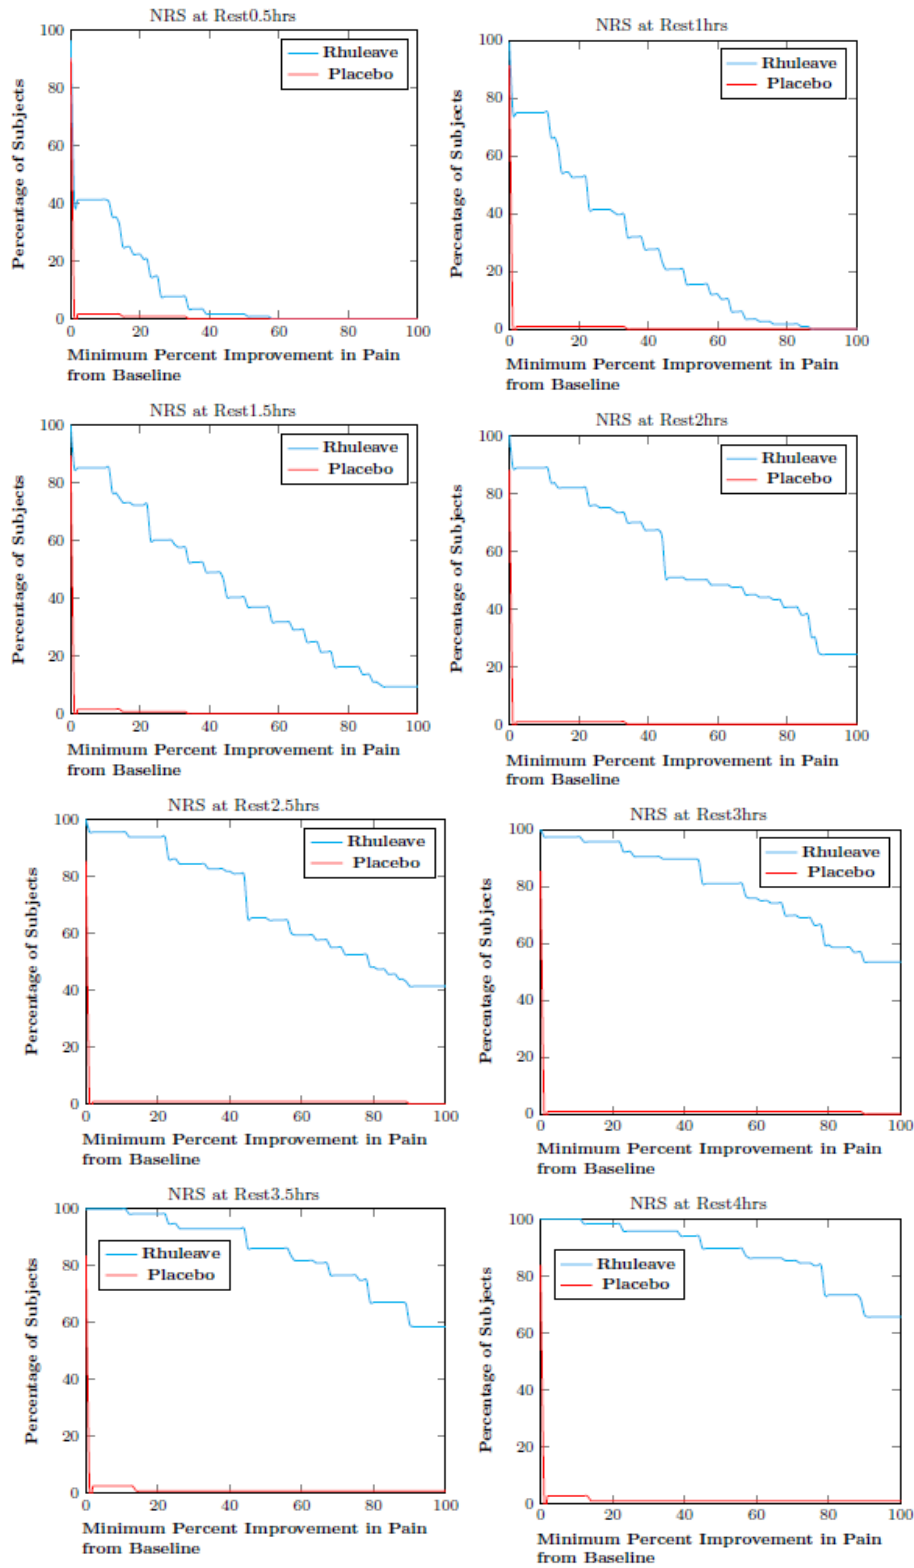

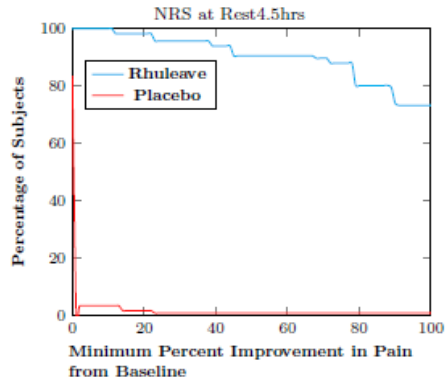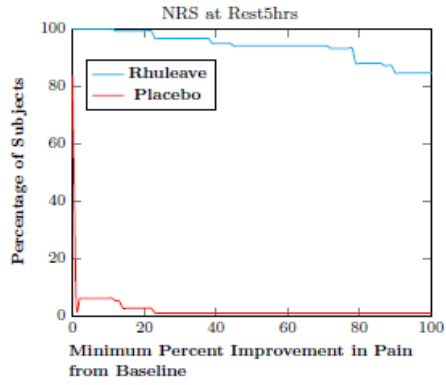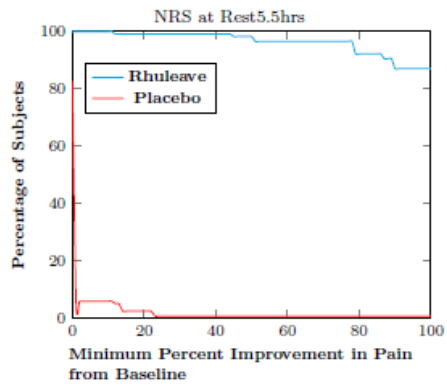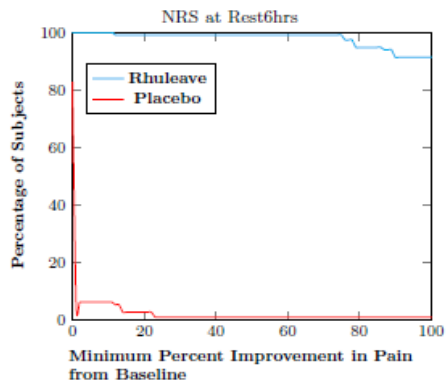

Supplementary figure S2. Cumulative proportion of responder analysis - NRS at Movement

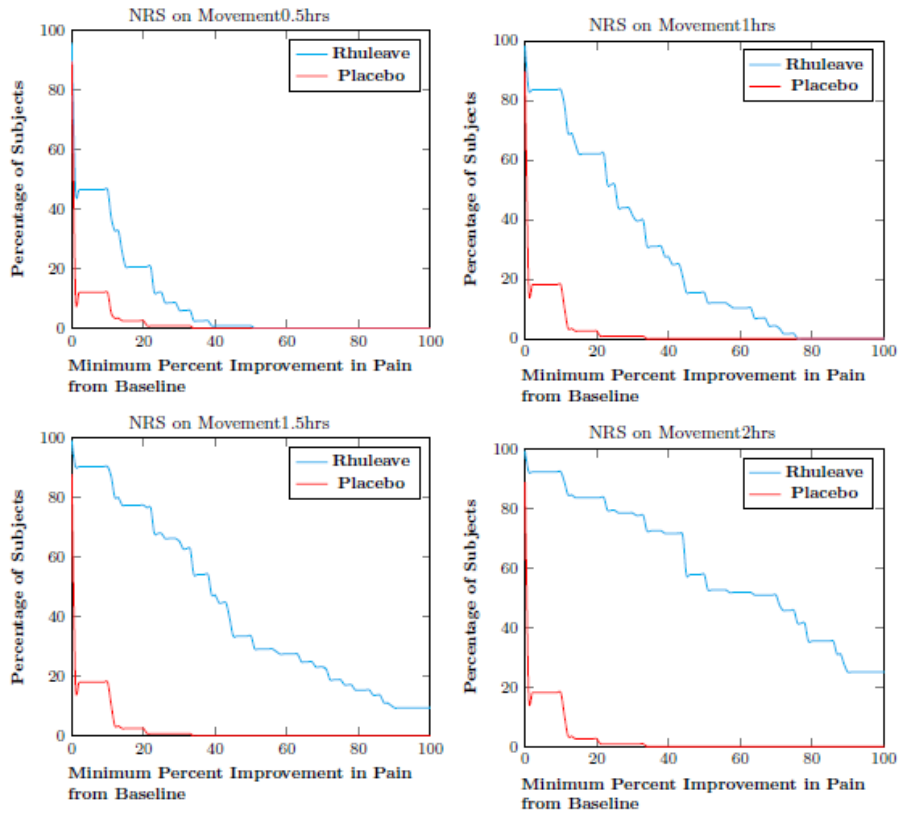

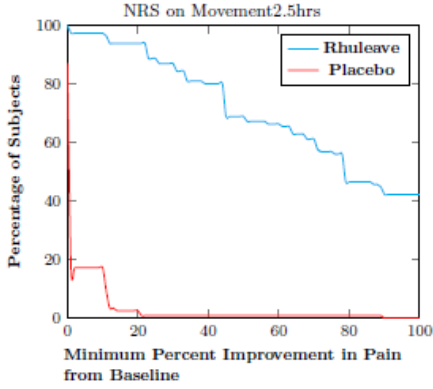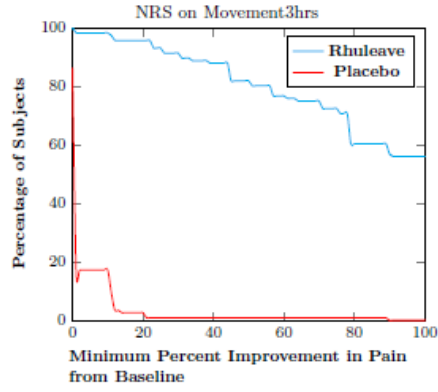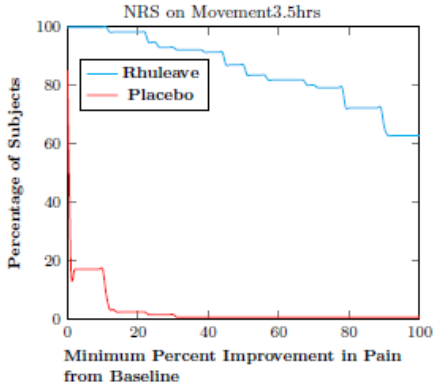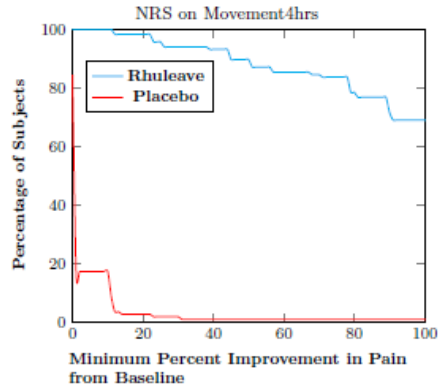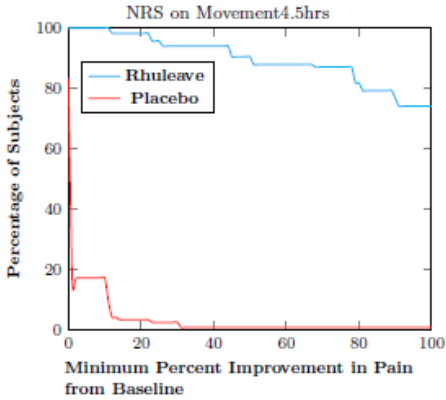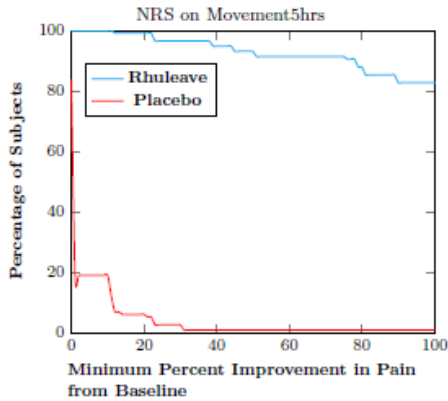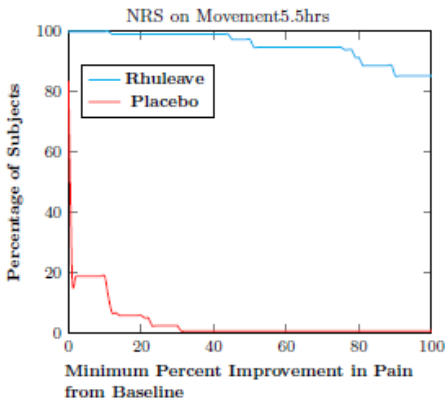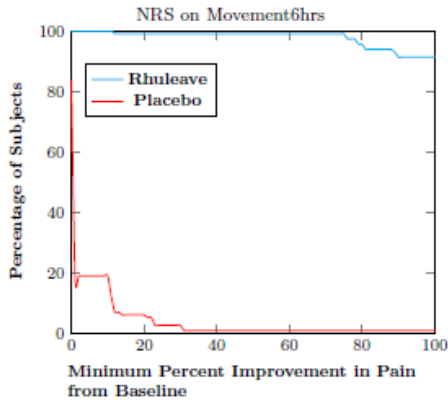

Supplementary figure S3. Cumulative proportion of responder analysis - NRS at Pressure

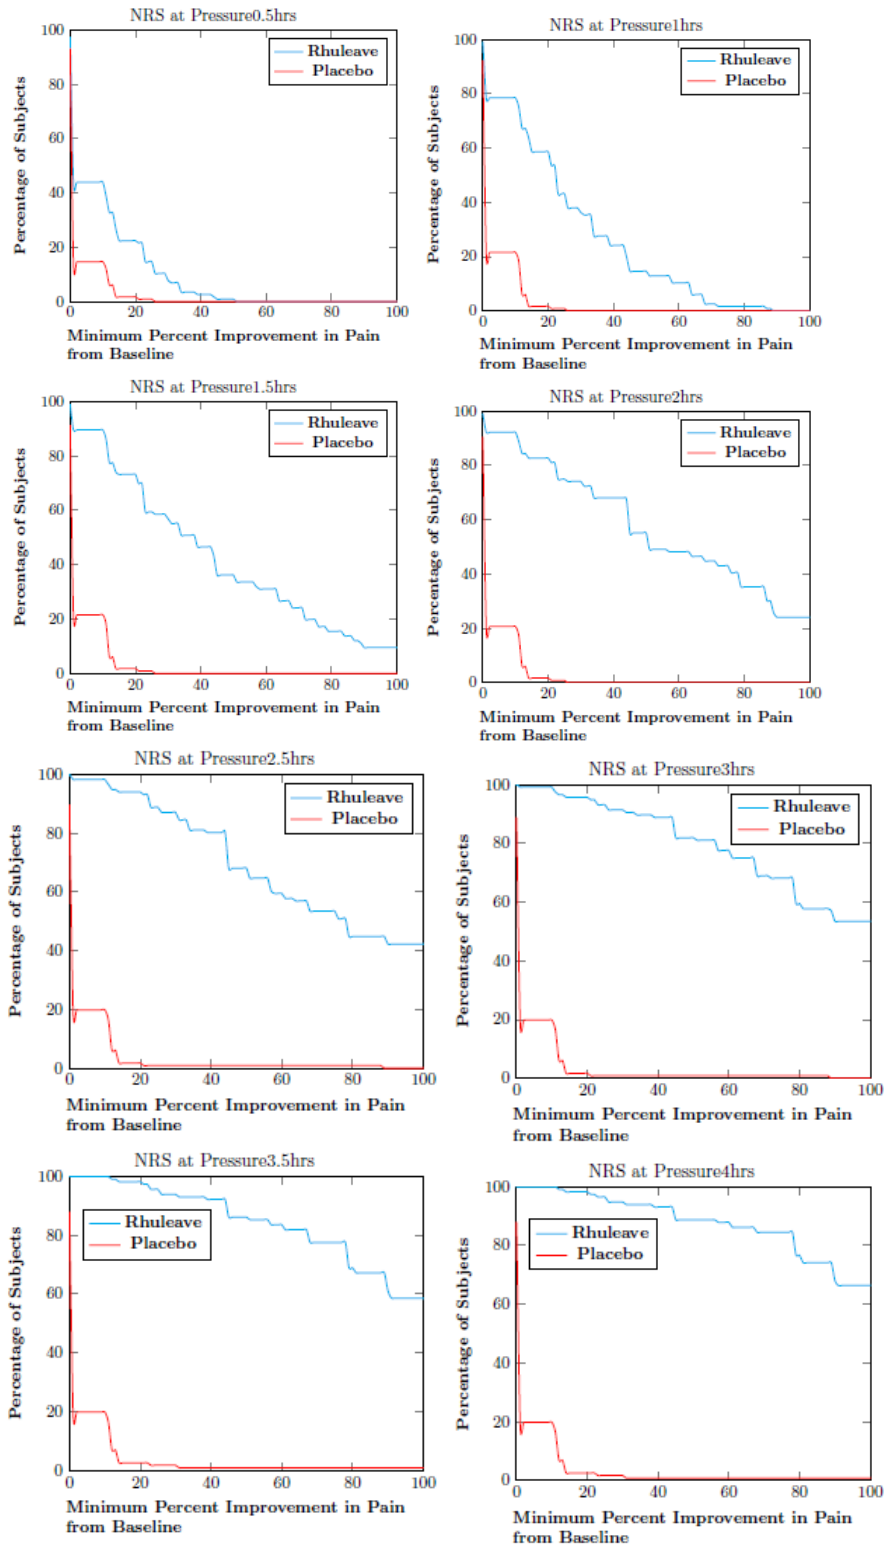

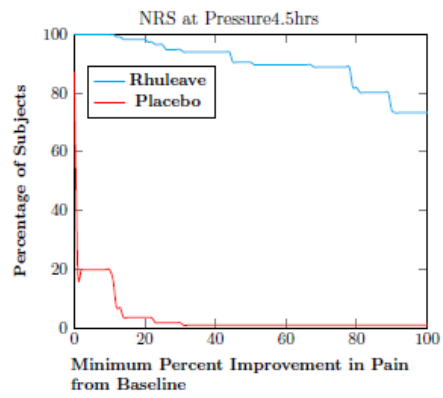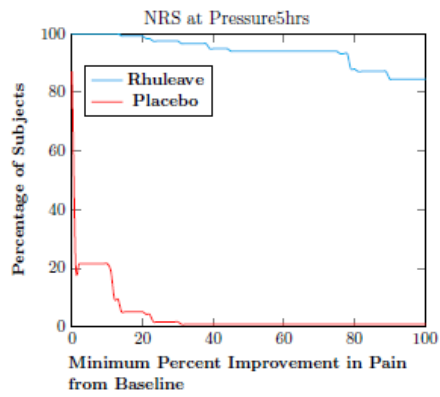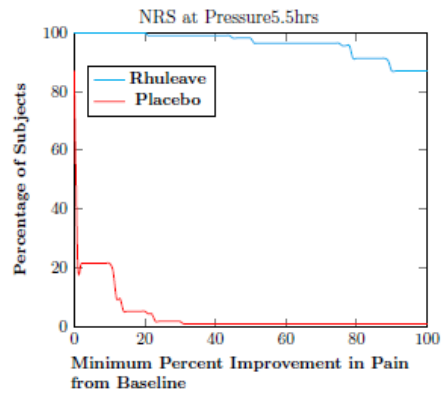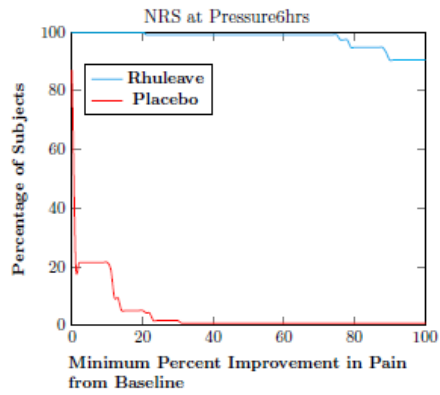

Supplement: medi-101-e30144-s003.pdf [file medi-101-e30144-s003.pdf]
