# Supplementary material for: Fast pain relief in exercise-induced acute musculoskeletal pain by turmeric-boswellia formulation: A randomized placebo-controlled double-blinded multicentre study
Source: PubMed Central journal article supplement (PMC9439841; doi:10.1097/md.0000000000030144), 2022-09-02
Supplement: medi-101-e30144-s001.pdf [file medi-101-e30144-s001.pdf]

| Supplementary table S1. Time points and schedule of activities                                                           |                         |                      |                                        |           |
|--------------------------------------------------------------------------------------------------------------------------|-------------------------|----------------------|----------------------------------------|-----------|
| Activities                                                                                                               | Screening<br>(Pre-dose) | Randomization<br>0 h | Post dose<br>0 – 6 h<br>(every 30 min) | After 6 h |
| Informed consent                                                                                                         | <b>X</b>                |                      |                                        |           |
| Demographics/<br>Medical History                                                                                         | <b>X</b>                |                      |                                        |           |
| Physical<br>examination/ Vitals                                                                                          | <b>X</b>                |                      |                                        |           |
| NRS (at rest)                                                                                                            | <b>X</b>                |                      | <b>X</b>                               |           |
| NRS (on movement)                                                                                                        | <b>X</b>                |                      | <b>X</b>                               |           |
| NRS (with pressure)                                                                                                      | <b>X</b>                |                      | <b>X</b>                               |           |
| McGill-SFQ                                                                                                               | <b>X</b>                |                      |                                        | <b>X</b>  |
| IP allocation                                                                                                            |                         | <b>X</b>             |                                        |           |
| PRS (at rest)                                                                                                            |                         |                      | <b>X</b>                               |           |
| PRS (on movement )                                                                                                       |                         |                      | <b>X</b>                               |           |
| PRS (with pressure)                                                                                                      |                         |                      | <b>X</b>                               |           |
| Onset of Analgesia                                                                                                       |                         |                      | <b>X</b>                               |           |
| NRS = Numerical Rating Scale<br>PRS = Pain Relief Scale<br>IP = Investigational Product<br>SFQ= Short Form Questionnaire |                         |                      |                                        |           |
