# Supplementary material for: Fast pain relief in exercise-induced acute musculoskeletal pain by turmeric-boswellia formulation: A randomized placebo-controlled double-blinded multicentre study
Source: PubMed Central journal article supplement (PMC9439841; doi:10.1097/md.0000000000030144), 2022-09-02
Supplement: medi-101-e30144-s002.pdf [file medi-101-e30144-s002.pdf]

Supplementary table S2. Demographics and baseline data of Turmeric-Boswellia formulation (TBF) and placebo groups

|              | TBF (n=116)   | Placebo (n=116) | #P value (2t) |
|--------------|---------------|-----------------|---------------|
|              | Mean ± SE     | Mean ± SE       |               |
| Age          | 37.18 ± 1.19  | 37.55 ± 1.25    | 0.919         |
| Height       | 166.85 ± 0.87 | 166.69 ± 0.81   | 0.747         |
| Weight       | 69.81 ± 1.07  | 69.75 ± 1.08    | 0.846         |
| NRS Rest     | 7.97 ± 0.11   | 7.66 ± 0.11     | 0.053*        |
| NRS Movement | 8.41 ± 0.10   | 8.28 ± 0.10     | 0.357*        |
| NRS Pressure | 8.44 ± 0.10   | 8.29 ± 0.09     | 0.266*        |

# Mann-Whitney U test.

\* Kolmogorov-Smirnov Test for Comparing Distributions
