# Supplementary material for: Fast pain relief in exercise-induced acute musculoskeletal pain by turmeric-boswellia formulation: A randomized placebo-controlled double-blinded multicentre study
Source: PubMed Central journal article supplement (PMC9439841; doi:10.1097/md.0000000000030144), 2022-09-02
Supplement: medi-101-e30144-s004.pdf [file medi-101-e30144-s004.pdf]

Supplementary figure S4. Subjects achieving perceptible pain relief

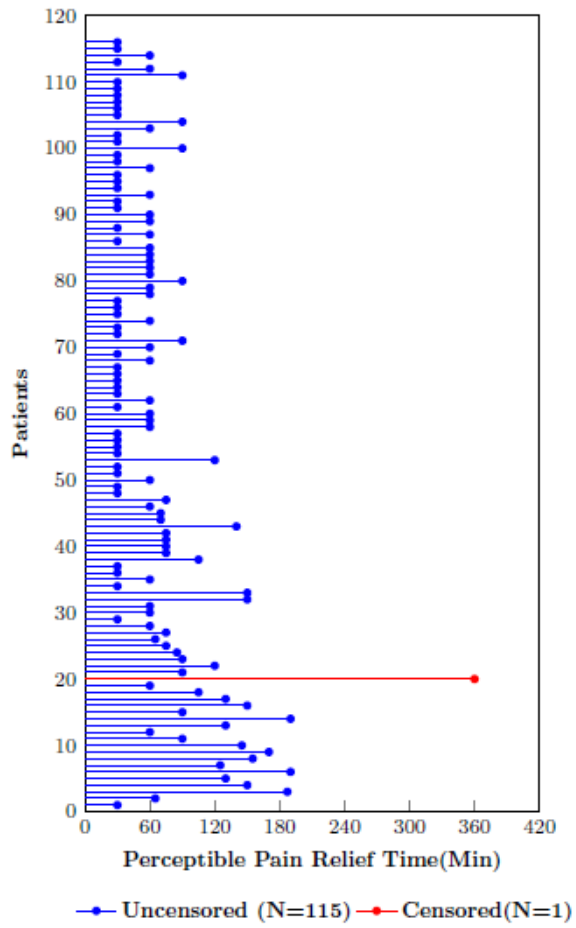

(A) Turmeric-Boswellia Formulation

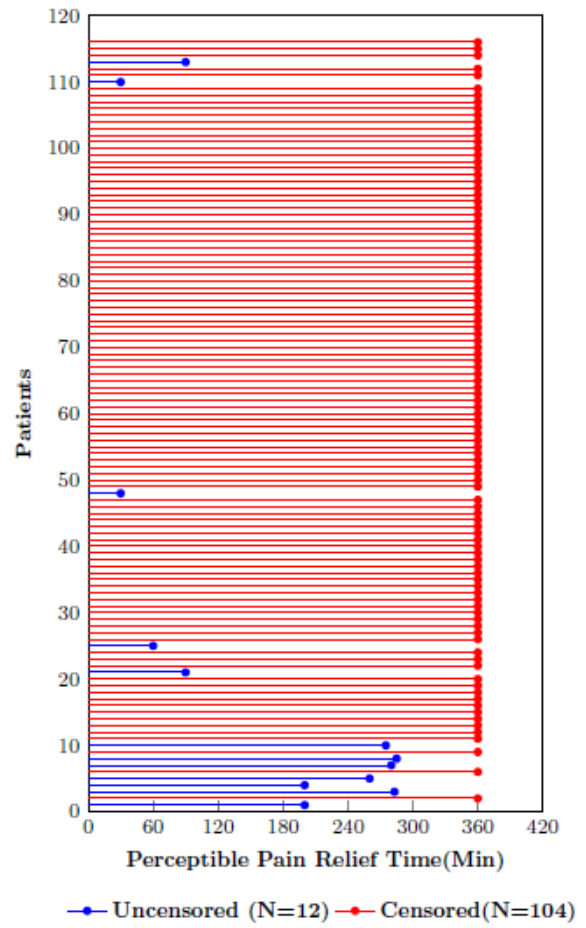

(B) Placebo

Supplementary figure S5. Subjects achieving Meaningful pain relief

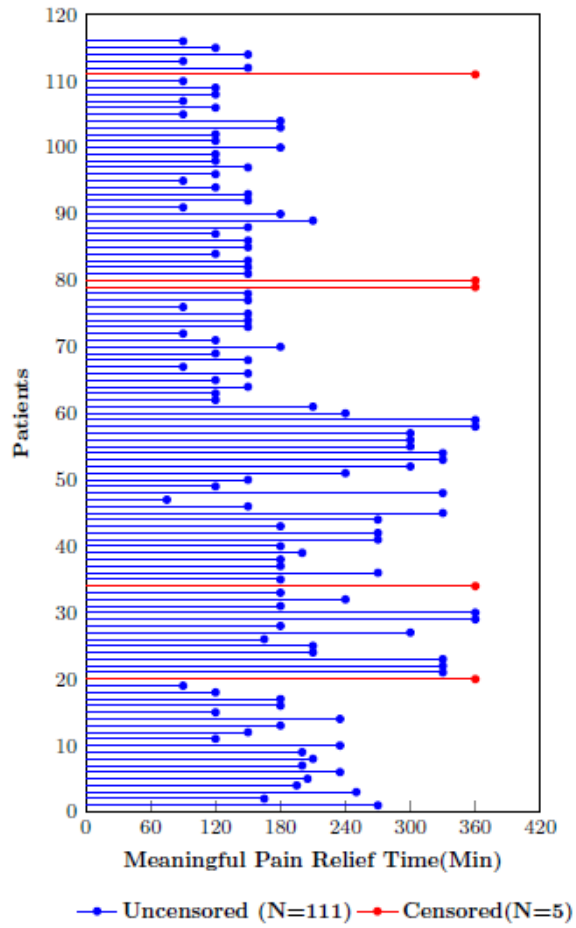

(A) Turmeric-Boswellia Formulation

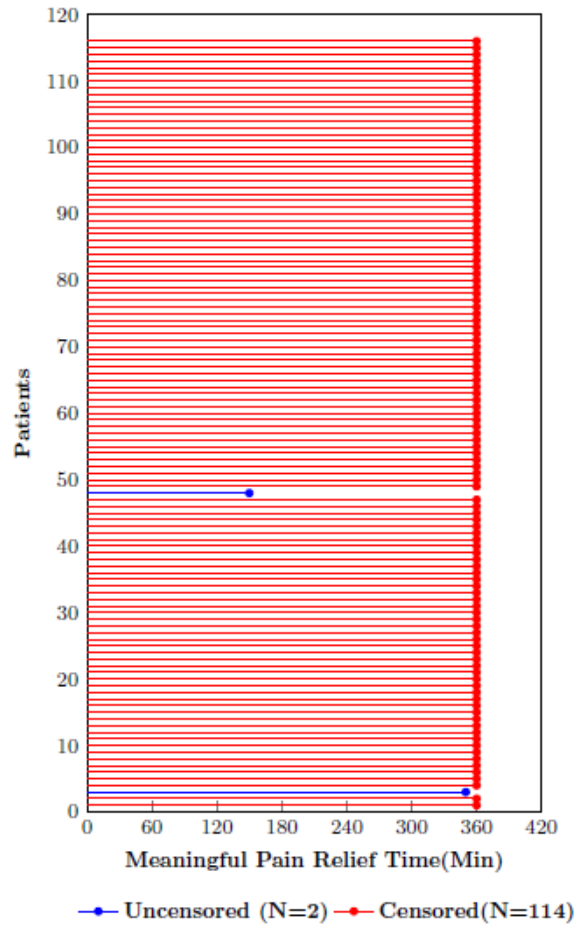

(B) Placebo
