# Supplementary material for: Fast pain relief in exercise-induced acute musculoskeletal pain by turmeric-boswellia formulation: A randomized placebo-controlled double-blinded multicentre study
Source: PubMed Central journal article supplement (PMC9439841; doi:10.1097/md.0000000000030144), 2022-09-02
Supplement: medi-101-e30144-s005.pdf [file medi-101-e30144-s005.pdf]

Supplementary table S3. Kaplan-Meier Product-Limit Survival Analysis for perceptible pain relief in Placebo group

| Event Time | Cumulative Survival | Standard Error | Lower 95% Confidence Limit | Upper 95% Confidence Limit | At Risk | Count | Total Events |
|------------|---------------------|----------------|----------------------------|----------------------------|---------|-------|--------------|
| 30.0       | 0.9828              | 0.0121         | 0.9591                     | 1.0000                     | 116     | 2     | 2            |
| 60.0       | 0.9741              | 0.0147         | 0.9453                     | 1.0000                     | 114     | 1     | 3            |
| 90.0       | 0.9569              | 0.0189         | 0.9199                     | 0.9939                     | 113     | 2     | 5            |
| 200.0      | 0.9397              | 0.0221         | 0.8963                     | 0.9830                     | 111     | 2     | 7            |
| 260.0      | 0.9310              | 0.0235         | 0.8849                     | 0.9771                     | 109     | 1     | 8            |
| 275.0      | 0.9224              | 0.0248         | 0.8737                     | 0.9711                     | 108     | 1     | 9            |
| 280.0      | 0.9138              | 0.0261         | 0.8627                     | 0.9649                     | 107     | 1     | 10           |
| 283.0      | 0.9052              | 0.0272         | 0.8519                     | 0.9585                     | 106     | 1     | 11           |
| 285.0      | 0.8966              | 0.0283         | 0.8411                     | 0.9520                     | 105     | 1     | 12           |
| 360.0+     |                     |                |                            |                            | 104     |       |              |

Supplementary table S4. Kaplan-Meier Product-Limit Survival Analysis for perceptible pain relief in Turmeric-Boswellia formulation (TBF) group

| Event Time | Cumulative Survival | Standard Error | Lower 95% Confidence Limit | Upper 95% Confidence Limit | At Risk | Count | Total Events |
|------------|---------------------|----------------|----------------------------|----------------------------|---------|-------|--------------|
| 30.0       | 0.6121              | 0.0452         | 0.5234                     | 0.7007                     | 116     | 45    | 45           |
| 60.0       | 0.3534              | 0.0444         | 0.2665                     | 0.4404                     | 71      | 30    | 75           |
| 65.0       | 0.3362              | 0.0439         | 0.2502                     | 0.4222                     | 41      | 2     | 77           |
| 70.0       | 0.3190              | 0.0433         | 0.2341                     | 0.4038                     | 39      | 2     | 79           |
| 75.0       | 0.2586              | 0.0407         | 0.1789                     | 0.3383                     | 37      | 7     | 86           |
| 85.0       | 0.2500              | 0.0402         | 0.1712                     | 0.3288                     | 30      | 1     | 87           |
| 90.0       | 0.1724              | 0.0351         | 0.1037                     | 0.2412                     | 29      | 9     | 96           |
| 105.0      | 0.1552              | 0.0336         | 0.0893                     | 0.2211                     | 20      | 2     | 98           |
| 120.0      | 0.1379              | 0.0320         | 0.0752                     | 0.2007                     | 18      | 2     | 100          |
| 125.0      | 0.1293              | 0.0312         | 0.0682                     | 0.1904                     | 16      | 1     | 101          |
| 130.0      | 0.1034              | 0.0283         | 0.0480                     | 0.1589                     | 15      | 3     | 104          |
| 140.0      | 0.0948              | 0.0272         | 0.0415                     | 0.1481                     | 12      | 1     | 105          |
| 145.0      | 0.0862              | 0.0261         | 0.0351                     | 0.1373                     | 11      | 1     | 106          |
| 150.0      | 0.0517              | 0.0206         | 0.0114                     | 0.0920                     | 10      | 4     | 110          |
| 155.0      | 0.0431              | 0.0189         | 0.0061                     | 0.0801                     | 6       | 1     | 111          |
| 170.0      | 0.0345              | 0.0169         | 0.0013                     | 0.0677                     | 5       | 1     | 112          |
| 187.0      | 0.0259              | 0.0147         | 0.0000                     | 0.0547                     | 4       | 1     | 113          |
| 190.0      | 0.0086              | 0.0086         | 0.0000                     | 0.0254                     | 3       | 2     | 115          |
| 360.0+     |                     |                |                            |                            | 1       |       |              |

**Supplementary table S5. Kaplan-Meier Product-Limit Survival Analysis for meaningful pain relief in Placebo group**

| <u>Event Time</u> | <u>Cumulative Survival</u> | <u>Standard Error</u> | <u>Lower 95% Confidence Limit</u> | <u>Upper 95% Confidence Limit</u> | <u>At Risk</u> | <u>Count</u> | <u>Total Events</u> |
|-------------------|----------------------------|-----------------------|-----------------------------------|-----------------------------------|----------------|--------------|---------------------|
| 150.0             | 0.9914                     | 0.0086                | 0.9746                            | 1.0000                            | 116            | 1            | 1                   |
| 350.0             | 0.9828                     | 0.0121                | 0.9591                            | 1.0000                            | 115            | 1            | 2                   |
| 360.0+            |                            |                       |                                   |                                   | 114            |              |                     |

Formatted: Font color: Auto

Formatted: Normal, Left, Tab stops: Not at 1.51" + 2.52" + 3.52" + 4.53" + 5.24" + 5.89" + 6.55"

**Supplementary table S6. Kaplan-Meier Product-Limit Survival Analysis for meaningful pain relief in Turmeric-Boswellia formulation (TBF) group**

| <u>Event Time</u> | <u>Cumulative Survival</u> | <u>Standard Error</u> | <u>Lower 95% Confidence Limit</u> | <u>Upper 95% Confidence Limit</u> | <u>At Risk</u> | <u>Count</u> | <u>Total Events</u> |
|-------------------|----------------------------|-----------------------|-----------------------------------|-----------------------------------|----------------|--------------|---------------------|
| 75.0              | 0.9914                     | 0.0086                | 0.9746                            | 1.0000                            | 116            | 1            | 1                   |
| 90.0              | 0.8966                     | 0.0283                | 0.8411                            | 0.9520                            | 115            | 11           | 12                  |
| 120.0             | 0.7155                     | 0.0419                | 0.6334                            | 0.7976                            | 104            | 21           | 33                  |
| 150.0             | 0.5259                     | 0.0464                | 0.4350                            | 0.6167                            | 83             | 22           | 55                  |
| 165.0             | 0.5086                     | 0.0464                | 0.4176                            | 0.5996                            | 61             | 2            | 57                  |
| 180.0             | 0.3707                     | 0.0448                | 0.2828                            | 0.4586                            | 59             | 16           | 73                  |
| 195.0             | 0.3621                     | 0.0446                | 0.2746                            | 0.4495                            | 43             | 1            | 74                  |
| 200.0             | 0.3362                     | 0.0439                | 0.2502                            | 0.4222                            | 42             | 3            | 77                  |
| 205.0             | 0.3276                     | 0.0436                | 0.2422                            | 0.4130                            | 39             | 1            | 78                  |
| 210.0             | 0.2845                     | 0.0419                | 0.2024                            | 0.3666                            | 38             | 5            | 83                  |
| 235.0             | 0.2586                     | 0.0407                | 0.1789                            | 0.3383                            | 33             | 3            | 86                  |
| 240.0             | 0.2328                     | 0.0392                | 0.1559                            | 0.3097                            | 30             | 3            | 89                  |
| 250.0             | 0.2241                     | 0.0387                | 0.1483                            | 0.3000                            | 27             | 1            | 90                  |
| 270.0             | 0.1810                     | 0.0358                | 0.1110                            | 0.2511                            | 26             | 5            | 95                  |
| 300.0             | 0.1379                     | 0.0320                | 0.0752                            | 0.2007                            | 21             | 5            | 100                 |
| 330.0             | 0.0776                     | 0.0248                | 0.0289                            | 0.1263                            | 16             | 7            | 107                 |
| 360.0             | 0.0431                     | 0.0189                | 0.0061                            | 0.0801                            | 9              | 4            | 111                 |
| 360.0+            |                            |                       |                                   |                                   | 5              |              |                     |

Formatted: Font color: Auto

Formatted: Normal, Left, Tab stops: Not at 1.51" + 2.52" + 3.52" + 4.53" + 5.24" + 5.89" + 6.55"
