# Supplementary material for: Fast pain relief in exercise-induced acute musculoskeletal pain by turmeric-boswellia formulation: A randomized placebo-controlled double-blinded multicentre study
Source: PubMed Central journal article supplement (PMC9439841; doi:10.1097/md.0000000000030144), 2022-09-02
Supplement: medi-101-e30144-s006.pdf [file medi-101-e30144-s006.pdf]

| Supplementary table S7: Analysis of survival probability between Turmeric-Boswellia formulation (TBF) and placebo groups |                         |      |         |                        |      |         |
|--------------------------------------------------------------------------------------------------------------------------|-------------------------|------|---------|------------------------|------|---------|
| Statistical test                                                                                                         | Perceptible Pain Relief |      |         | Meaningful Pain Relief |      |         |
|                                                                                                                          | Chi-Square              | df   | p-value | Chi-Square             | df   | p-value |
| Logrank                                                                                                                  | 250.513                 | 1.00 | <0.001  | 240.89                 | 1.00 | <0.001  |
| Gehan-Wilcoxon                                                                                                           | 197.3                   | 1.00 | <0.001  | 200.60                 | 1.00 | <0.001  |
| Tarone-Ware                                                                                                              | 223.191                 | 1.00 | <0.001  | 220.74                 | 1.00 | <0.001  |

| Supplementary table S8: Log Rank Test Hazard Ratio (Symptom Resolution Ratio) for Perceptible and meaningful pain relief |                         |                 |                         |                         |                     |                         |                      |        |            |         |
|--------------------------------------------------------------------------------------------------------------------------|-------------------------|-----------------|-------------------------|-------------------------|---------------------|-------------------------|----------------------|--------|------------|---------|
| Group Ratio                                                                                                              |                         | Sample Size (n) | Observed Events (TBF/P) | Expected events (TBF/P) | Hazard rate (TBF/P) | Cox-Mantel Hazard ratio | 95%CI (Hazard ratio) |        | Chi-Square | P value |
|                                                                                                                          |                         |                 |                         |                         |                     |                         | Lower                | Upper  |            |         |
| TBFt /Placebo                                                                                                            | Perceptible Pain Relief | 116/ 116        | 115/12                  | 42.46/84.54             | 2.71/0.14           | 19.08                   | 13.20                | 27.59  | 186.19     | <0.001  |
|                                                                                                                          | Meaningful Pain Relief  | 116/ 116        | 111/2                   | 38.58/74.42             | 2.88/0.03           | 107.06                  | 72.57                | 157.95 | 206.43     | <0.001  |

TBF/P = Turmeric-Boswellia formulation/Placebo ratio

| Supplementary table S9. COX Regression analysis for symptom resolution rate of Turmeric-Boswellia formulation (TBF) group compared to placebo |             |                 |       |                       |         |             |          |
|-----------------------------------------------------------------------------------------------------------------------------------------------|-------------|-----------------|-------|-----------------------|---------|-------------|----------|
|                                                                                                                                               |             | Coefficient (b) | SE    | SRR (e <sup>b</sup> ) | P value | 95% CI (RR) |          |
|                                                                                                                                               |             |                 |       |                       |         | Lower       | Upper    |
| Perceptible Pain Relief                                                                                                                       | NRS at Rest | -0.323          | 0.079 | 0.724                 | <0.001  | 0.620       | 0.846    |
|                                                                                                                                               | TBF         | 4.426           | 0.383 | 83.566                | <0.001  | 39.460      | 176.970  |
| Meaningful Pain Relief                                                                                                                        | NRS at Rest | -0.446          | 0.091 | 0.640                 | <0.001  | 0.536       | 0.766    |
|                                                                                                                                               | TBF         | 5.606           | 0.727 | 272.116               | <0.001  | 65.469      | 1131.027 |

SRR: Symptom Resolution Ratio  
SE = standard error of coefficient  
e<sup>b</sup> = exponential of coefficient  
RR = Resolution rate
