# Supplementary material for: Fast pain relief in exercise-induced acute musculoskeletal pain by turmeric-boswellia formulation: A randomized placebo-controlled double-blinded multicentre study
Source: PubMed Central journal article supplement (PMC9439841; doi:10.1097/md.0000000000030144), 2022-09-02

Supplementary figure S6. Schoenfield Plot comparing  $NRS_{rest}$  with PPR

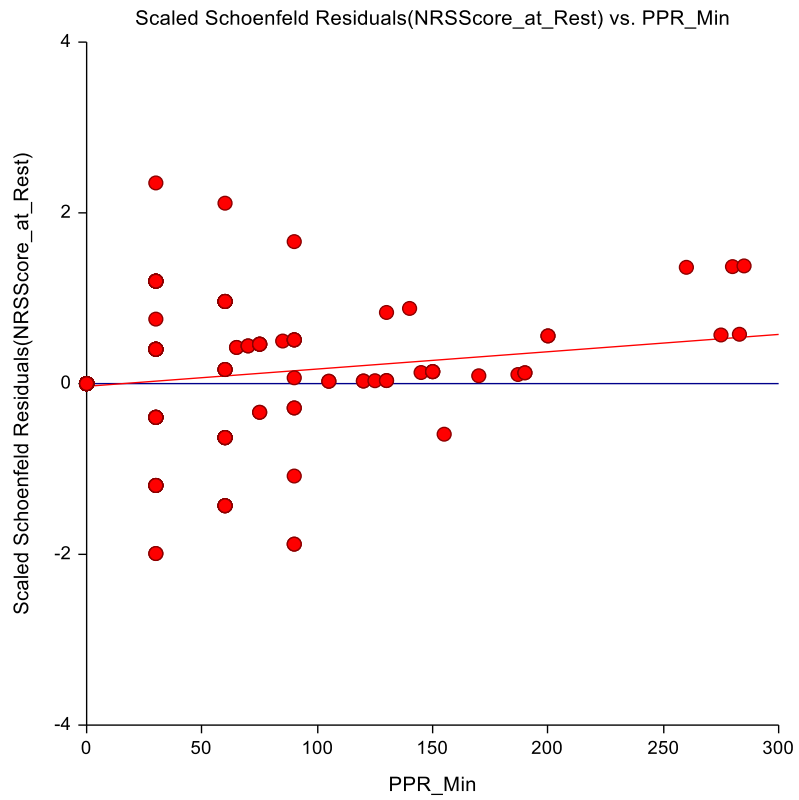

Supplementary figure S7. Schoenfield Plot comparing  $NRS_{rest}$  with MPR

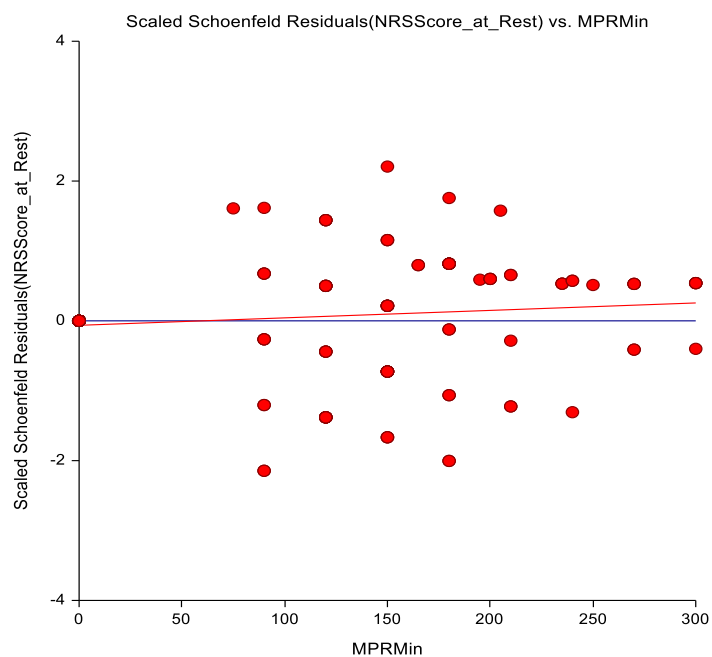

Supplement: medi-101-e30144-s007.pdf [file medi-101-e30144-s007.pdf]
